# Supplementary material
Source: publisher figshare collection journal article supplement (https://frontiersin.figshare.com/ndownloader/files/28321203)
Supplement: Supplementary file 1 [file 28321203]

## Sheet: Lynx-traps coordinates
Data S4: Coordinates (EPSG: 21780) of the detected lynx-traps
ID	X	Y
1	571101	111376
2	571456	111043
3	571376	110701
4	571342	111145
5	571475	111094
6	570149	112221
7	570126	112446
8	570898	112771
9	570774	113536
10	570673	112817
11	570411	113020
12	570697	110120
13	570379	112374
14	570382	112499
15	570544	112234
16	570537	112344
17	570509	112469
